# Supplementary material
Source: PubMed Central journal article supplement (PMC3838268)
Supplement: JVI.02436-13_zjv999098430so1.pdf [file JVI.02436-13_zjv999098430so1.pdf]

**Supplemental movie 1:** Intercellular measles virus transmission in hippocampal brain explant. Organotypic brain slices from CD150 tg mice were infected with  $10^4$  PFU of MV-IC323-EGFP for 24h and followed by time-lapse microscopy for 30h, using Zeiss Time-lapse Axiovert 100M microscope at 37 °C and 5% CO<sub>2</sub> (exposure 100ms, objective 10x) and analyzed with Metamorph®Software.
